# Supplementary material
Source: Springer Nature journal article supplement (https://www.springermedizin.de/resource/supplementary/12885_2013_4351_MOESM5_ESM.pdf/9466046)

A

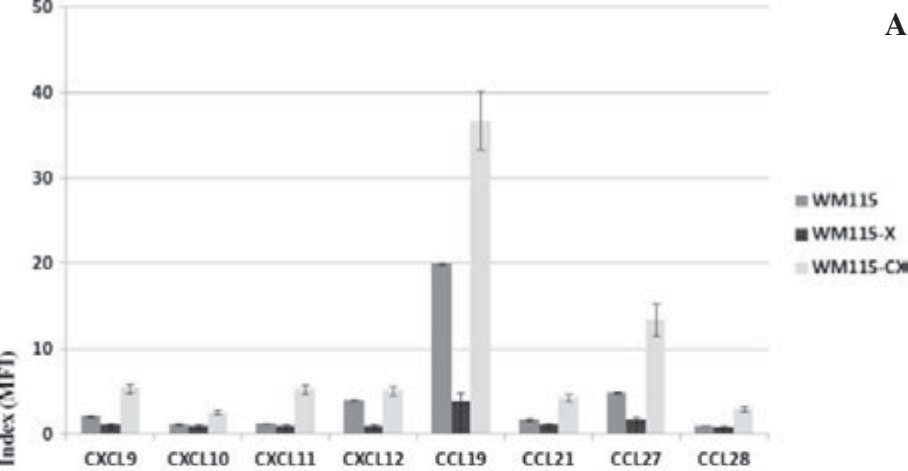

B

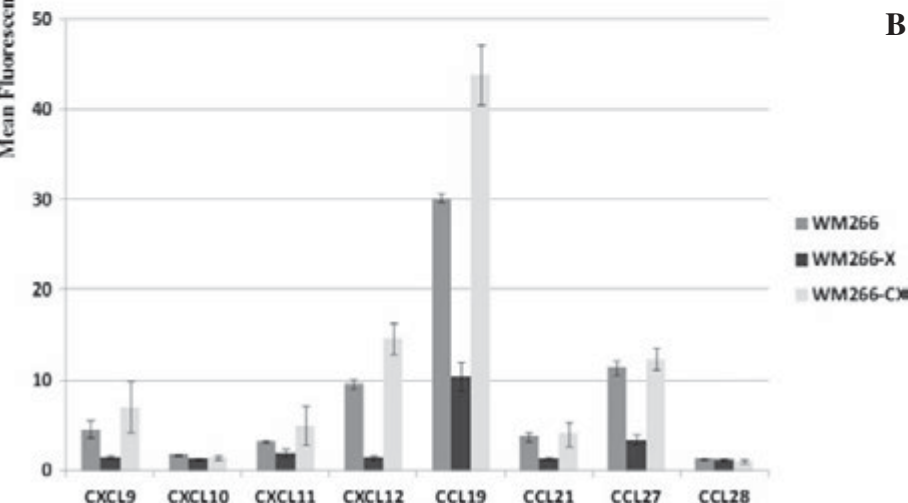

Supplement: MOESM5 [file 9466046]
